# Supplementary material
Source: publisher figshare collection journal article supplement (https://karger.figshare.com/ndownloader/files/25745096)
Supplement: Supplementary file 1 [file 25745096]

**Vor meinem individuellen Experiment…**

1.) Meine allgemeine Befürchtung, die ich überprüfen möchte (Überzeugung 0-100):

2.) Meine Situation, anhand welcher ich meine Befürchtung überprüfen möchte (Beschreibung des Experiments in eigenen Worten):

3.) Meine konkrete Erwartung in dieser Situation (Überzeugung 0-100):

4.) Merkmale (z. B. Ereignisse, Reaktionen), anhand derer ich meine Erwartung überprüfen kann (min. 3, max. 5):

| 1 |  |
| --- | --- |
| 2 |  |
| 3 |  |
| 4 |  |
| 5 |  |

5.) Als wie überzeugend ordne ich die Merkmale unter 4.) ein:

Wenig überzeugend Mittelmäßig überzeugend Sehr überzeugend

|  |  |  |  |  |  |  |
| --- | --- | --- | --- | --- | --- | --- |
|  |  |  |  |  |  |  |
|  |  |  |  |  |  |  |
